# Supplementary material for: SNX20AR/MiRNA-301a-3p/SNX20 Axis Associated With Cell Proliferation and Immune Infiltration in Lung Adenocarcinoma
Source: Front Mol Biosci. 2021 Sep 17;8:744363. doi: 10.3389/fmolb.2021.744363 (PMC8484765; doi:10.3389/fmolb.2021.744363)
Supplement: Supplementary file 6 [file Table1.xlsx]

## Sheet: SheetName
symbol	drug	cor	fdr
SNX20	teniposide	-0.419758	4.89156e-17
SNX20	BRD-K30748066	-0.387485	0.015418
SNX20	SR-II-138A	-0.366925	2.05764e-25
SNX20	narciclasine	-0.363822	1.89563e-23
SNX20	GSK461364	-0.36203	1.22091e-23
SNX20	CR-1-31B	-0.357917	1.01048e-23
SNX20	LY-2183240	-0.347964	3.2537e-22
SNX20	LRRK2-IN-1	-0.34362	1.88699e-15
SNX20	SNX-2112	-0.343263	1.03951e-21
SNX20	piperlongumine	-0.342156	1.87048e-21
SNX20	ciclopirox	-0.341216	1.57305e-21
SNX20	PX-12	-0.341006	6.65726e-21
SNX20	triazolothiadiazine	-0.340511	8.6191e-22
SNX20	BI-2536	-0.3383	1.44031e-21
SNX20	cytarabine hydrochloride	-0.338144	4.42436e-21
SNX20	PRIMA-1	-0.335811	2.52719e-19
SNX20	parbendazole	-0.334231	5.87712e-21
SNX20	belinostat	-0.33397	2.12489e-10
SNX20	decitabine	-0.332627	2.03511e-20
SNX20	COL-3	-0.33237	1.67618e-14
SNX20	BRD-K66453893	-0.331662	6.97073e-20
SNX20	panobinostat	-0.329371	4.45121e-20
SNX20	sotrastaurin	-0.327453	9.58368e-14
SNX20	vincristine	-0.326792	1.79192e-20
SNX20	NSC95397	-0.326398	3.74965e-17
SNX20	AT13387	-0.321466	7.15142e-09
SNX20	etoposide	-0.320918	7.32215e-19
SNX20	doxorubicin	-0.317532	5.51913e-19
SNX20	clofarabine	-0.315797	1.26342e-18
SNX20	CHM-1	-0.31564	2.86282e-18
SNX20	tacedinaline	-0.31541	5.59387e-13
SNX20	BRD-A94377914	-0.314998	1.48267e-09
SNX20	PL-DI	-0.31452	9.65307e-18
SNX20	gemcitabine	-0.313627	1.62644e-16
SNX20	ML311	-0.313241	2.79248e-18
SNX20	omacetaxine mepesuccinate	-0.312896	5.22497e-13
SNX20	SB-743921	-0.312262	2.28549e-18
SNX20	necrosulfonamide	-0.312202	2.63698e-12
SNX20	I-BET151	-0.311037	6.32497e-18
SNX20	isoevodiamine	-0.310669	1.199e-17
SNX20	elocalcitol	-0.309734	1.24084e-16
SNX20	apicidin	-0.306227	2.06469e-17
SNX20	indisulam	-0.30542	4.38715e-16
SNX20	manumycin A	-0.304019	8.40691e-17
SNX20	BRD-K70511574	-0.301902	1.42776e-16
SNX20	PF-184	-0.30147	7.09382e-16
SNX20	bardoxolone methyl	-0.300659	4.3795e-14
SNX20	AZD7762	-0.300228	2.50056e-16
SNX20	vorinostat	-0.300142	2.6946e-16
SNX20	FQI-1	-0.298728	9.87613e-09
SNX20	paclitaxel	-0.298543	5.4067e-16
SNX20	nakiterpiosin	-0.296733	5.6569e-16
SNX20	PHA-793887	-0.296104	3.05198e-16
SNX20	GSK525762A	-0.293531	7.8074e-16
SNX20	rigosertib	-0.29322	3.49011e-15
SNX20	KX2-391	-0.2921	1.83373e-15
SNX20	NSC632839	-0.291948	1.71345e-15
SNX20	KW-2449	-0.291568	1.28115e-15
SNX20	Merck60	-0.290016	1.7184e-15
SNX20	dacarbazine	-0.289765	9.05742e-15
SNX20	MK-1775	-0.289147	7.54236e-15
SNX20	dinaciclib	-0.288596	9.24448e-08
SNX20	MGCD-265	-0.286509	1.83621e-14
SNX20	topotecan	-0.285826	2.28242e-15
SNX20	chlorambucil	-0.285825	1.53225e-14
SNX20	crizotinib	-0.285188	1.47665e-14
SNX20	leptomycin B	-0.283501	2.65934e-15
SNX20	serdemetan	-0.282819	1.62743e-13
SNX20	PF-3758309	-0.282663	1.48865e-07
SNX20	FQI-2	-0.281988	6.96756e-15
SNX20	YK 4-279	-0.280624	1.27479e-14
SNX20	fluorouracil	-0.280479	4.27964e-14
SNX20	CD-437	-0.28042	2.26414e-14
SNX20	GW-405833	-0.280259	3.58647e-14
SNX20	JQ-1	-0.279943	1.52839e-14
SNX20	SB-225002	-0.27959	8.7902e-15
SNX20	tipifarnib-P2	-0.278801	7.01769e-08
SNX20	BRD-K80183349	-0.277421	1.43923e-13
SNX20	neuronal differentiation inducer III	-0.27696	6.76257e-14
SNX20	Compound 23 citrate	-0.274748	3.01216e-13
SNX20	isoliquiritigenin	-0.274724	0.000666499
SNX20	neopeltolide	-0.272503	0.00137947
SNX20	alisertib	-0.271792	2.05624e-13
SNX20	BRD-A86708339	-0.271566	1.60981e-06
SNX20	avrainvillamide	-0.270843	2.20201e-09
SNX20	entinostat	-0.270585	3.08078e-13
SNX20	triptolide	-0.270417	6.2955e-13
SNX20	CCT036477	-0.269947	3.55073e-13
SNX20	ML031	-0.269205	5.12403e-11
SNX20	fingolimod	-0.268385	1.27657e-12
SNX20	BRD-K66532283	-0.2671	3.56964e-12
SNX20	KPT185	-0.266981	5.99666e-10
SNX20	docetaxel	-0.266962	2.07826e-06
SNX20	BRD-K34222889	-0.266818	3.56072e-13
SNX20	ISOX	-0.265255	6.30956e-13
SNX20	BRD-K61166597	-0.265214	4.45462e-12
SNX20	mitomycin	-0.265149	6.89438e-13
SNX20	tivantinib	-0.263424	1.23477e-06
SNX20	barasertib	-0.26275	1.80724e-12
SNX20	pevonedistat	-0.262367	4.82377e-12
SNX20	tretinoin	-0.262141	1.26013e-11
SNX20	phloretin	-0.261741	3.32705e-12
SNX20	NSC48300	-0.261067	2.01071e-12
SNX20	tozasertib	-0.260799	0.0986895
SNX20	bortezomib	-0.25967	7.32467e-12
SNX20	alvocidib	-0.259478	2.89918e-06
SNX20	TPCA-1	-0.259147	3.46006e-12
SNX20	pazopanib	-0.258426	8.03384e-12
SNX20	B02	-0.258355	1.84492e-11
SNX20	SNS-032	-0.257996	5.22391e-11
SNX20	ceranib-2	-0.257848	1.34592e-12
SNX20	zebularine	-0.25664	1.75177e-11
SNX20	PF-573228	-0.2559	9.08008e-12
SNX20	PAC-1	-0.255482	2.01491e-11
SNX20	NSC23766	-0.255281	3.20969e-11
SNX20	curcumin	-0.255223	6.33819e-12
SNX20	momelotinib	-0.255215	5.81644e-11
SNX20	BMS-345541	-0.253938	2.01277e-11
SNX20	ELCPK	-0.253378	6.26527e-06
SNX20	BRD-K26531177	-0.252648	8.86422e-11
SNX20	KU-60019	-0.252509	1.84831e-11
SNX20	bexarotene	-0.251772	2.25795e-09
SNX20	BIX-01294	-0.251453	1.72416e-11
SNX20	methylstat	-0.250414	3.40937e-08
SNX20	NVP-231	-0.249825	1.75116e-11
SNX20	gossypol	-0.249324	1.03521e-10
SNX20	Repligen 136	-0.248491	5.7244e-10
SNX20	PIK-93	-0.248461	2.04194e-10
SNX20	axitinib	-0.248277	2.08721e-11
SNX20	cerulenin	-0.247293	3.25956e-11
SNX20	tubastatin A	-0.245117	1.5136e-05
SNX20	CHIR-99021	-0.244011	7.07004e-10
SNX20	bendamustine	-0.243704	2.26775e-09
SNX20	ouabain	-0.243093	4.39976e-11
SNX20	GW-843682X	-0.242518	3.93104e-10
SNX20	NVP-BSK805	-0.240724	1.92899e-10
SNX20	obatoclax	-0.239748	1.04569e-10
SNX20	BRD-K51831558	-0.238399	0.000438613
SNX20	tipifarnib-P1	-0.235828	6.08746e-10
SNX20	dexamethasone	-0.235646	9.87235e-09
SNX20	TG-101348	-0.234415	7.88747e-10
SNX20	BRD-K35604418	-0.233457	8.94927e-10
SNX20	3-Cl-AHPC	-0.233356	3.39724e-10
SNX20	sirolimus	-0.232506	8.14974e-10
SNX20	MLN2238	-0.231894	8.60574e-10
SNX20	cucurbitacin I	-0.231639	1.75698e-09
SNX20	bosutinib	-0.23099	3.39983e-09
SNX20	sunitinib	-0.229982	1.67784e-09
SNX20	Compound 7d-cis	-0.229245	2.20427e-08
SNX20	OSI-930	-0.228543	4.74841e-08
SNX20	CIL55A	-0.228215	5.9881e-05
SNX20	KU 0060648	-0.227714	2.95143e-09
SNX20	AT7867	-0.226289	4.00903e-09
SNX20	temsirolimus	-0.22576	7.5752e-05
SNX20	tigecycline	-0.22548	6.7095e-05
SNX20	BRD-K92856060	-0.22419	1.07307e-08
SNX20	valdecoxib	-0.223177	8.30317e-09
SNX20	brivanib	-0.22271	1.23515e-08
SNX20	GSK-3 inhibitor IX	-0.222256	3.57758e-08
SNX20	AA-COCF3	-0.222086	4.26818e-08
SNX20	linifanib	-0.221522	3.11086e-09
SNX20	NSC19630	-0.221347	1.31283e-06
SNX20	ML210	-0.217036	2.10582e-08
SNX20	STF-31	-0.216756	1.62251e-08
SNX20	R428	-0.216308	4.42361e-06
SNX20	WP1130	-0.215883	2.14254e-08
SNX20	nutlin-3	-0.213722	2.78125e-08
SNX20	ABT-737	-0.213282	2.04537e-07
SNX20	methotrexate	-0.213079	7.89284e-08
SNX20	GSK-J4	-0.213024	0.170602
SNX20	BRD-K28456706	-0.212469	6.72931e-08
SNX20	CIL70	-0.212153	9.5862e-05
SNX20	pifithrin-mu	-0.211093	2.88109e-08
SNX20	MST-312	-0.211076	2.19383e-08
SNX20	navitoclax	-0.210694	8.33102e-08
SNX20	BRD-K85133207	-0.209715	5.46287e-07
SNX20	AZD8055	-0.20965	6.62413e-08
SNX20	HLI 373	-0.209561	8.45799e-08
SNX20	olaparib	-0.209466	3.47875e-08
SNX20	KU-55933	-0.209382	3.0906e-07
SNX20	QW-BI-011	-0.208321	0.0133739
SNX20	BRD1812	-0.207514	6.76385e-08
SNX20	N9-isopropylolomoucine	-0.207488	1.23679e-07
SNX20	marinopyrrole A	-0.207211	2.076e-05
SNX20	AZ-3146	-0.20537	1.6794e-07
SNX20	TW-37	-0.205086	1.46339e-07
SNX20	oligomycin A	-0.205044	1.03504e-07
SNX20	BRD-K41597374	-0.204324	9.65356e-08
SNX20	ruxolitinib	-0.203905	2.03034e-07
SNX20	bafilomycin A1	-0.202927	0.651535
SNX20	CIL56	-0.202033	0.000442067
SNX20	RITA	-0.200809	3.20626e-07
SNX20	masitinib	-0.20017	3.66324e-07
SNX20	imatinib	-0.199789	7.21387e-07
SNX20	Ko-143	-0.198015	2.74394e-07
SNX20	BRD6340	-0.197879	3.18851e-07
SNX20	purmorphamine	-0.197069	1.1443e-05
SNX20	darinaparsin	-0.193802	0.000985046
SNX20	SU11274	-0.193786	6.36297e-07
SNX20	SCH-79797	-0.192023	3.52507e-07
SNX20	NVP-BEZ235	-0.191975	5.5331e-05
SNX20	Mdivi-1	-0.191381	1.51676e-06
SNX20	PDMP	-0.191013	2.06868e-06
SNX20	StemRegenin 1	-0.190646	8.28297e-07
SNX20	KHS101	-0.189609	2.54714e-06
SNX20	BRD-K29313308	-0.189046	2.65383e-06
SNX20	1S,3R-RSL-3	-0.188897	8.33979e-07
SNX20	KU-0063794	-0.188014	2.00927e-06
SNX20	BRD-A71883111	-0.187233	3.76451e-06
SNX20	Bax channel blocker	-0.186809	6.9844e-06
SNX20	ML050	-0.186112	3.71352e-06
SNX20	OSI-027	-0.185393	3.42452e-06
SNX20	azacitidine	-0.184699	7.3665e-05
SNX20	ML029	-0.184599	7.76826e-06
SNX20	AZD1480	-0.184384	0.00423972
SNX20	BRD-K01737880	-0.183946	0.339346
SNX20	RO4929097	-0.182392	0.0115176
SNX20	CAY10618	-0.180638	1.82076e-06
SNX20	SMER-3	-0.179303	2.6603e-05
SNX20	tacrolimus	-0.179261	8.87939e-06
SNX20	ABT-199	-0.179181	0.000605376
SNX20	BRD-K88742110	-0.178549	7.00333e-06
SNX20	SN-38	-0.178046	2.3105e-05
SNX20	GMX-1778	-0.177673	4.65527e-06
SNX20	LE-135	-0.176974	2.0956e-05
SNX20	16-beta-bromoandrosterone	-0.176648	9.6145e-05
SNX20	NVP-TAE684	-0.176501	2.6756e-05
SNX20	necrostatin-1	-0.175669	5.8968e-05
SNX20	BIRB-796	-0.174156	3.7123e-05
SNX20	fulvestrant	-0.17398	0.537289
SNX20	BRD-K24690302	-0.173677	1.5667e-05
SNX20	BRD-K51490254	-0.173323	2.2341e-05
SNX20	BRD-K13999467	-0.173138	1.9214e-05
SNX20	Ki8751	-0.172453	2.1989e-05
SNX20	PRIMA-1-Met	-0.172199	0.00683207
SNX20	VER-155008	-0.172192	1.9476e-05
SNX20	MK-2206	-0.170874	3.3839e-05
SNX20	epigallocatechin-3-monogallate	-0.168567	6.5082e-05
SNX20	BRD-K11533227	-0.168219	5.2298e-05
SNX20	BRD-K29086754	-0.16821	0.290312
SNX20	BRD-K45681478	-0.167882	5.9595e-05
SNX20	BRD-K97651142	-0.166533	3.4191e-05
SNX20	SRT-1720	-0.166507	7.0579e-05
SNX20	tosedostat	-0.166085	4.234e-05
SNX20	cabozantinib	-0.16581	0.000152367
SNX20	RG-108	-0.164086	6.1502e-05
SNX20	PI-103	-0.163853	3.4924e-05
SNX20	DBeQ	-0.161945	8.9299e-05
SNX20	WZ8040	-0.161264	0.000452306
SNX20	PF-750	-0.160054	0.000304097
SNX20	AZD7545	-0.159211	9.9512e-05
SNX20	daporinad	-0.157796	0.000199539
SNX20	ML320	-0.157297	0.000232317
SNX20	UNC0638	-0.156587	0.000104414
SNX20	MI-2	-0.156215	0.0143102
SNX20	BRD-K63431240	-0.15619	0.000108616
SNX20	PYR-41	-0.152197	0.0018994
SNX20	BRD-K55116708	-0.151709	0.000313368
SNX20	tandutinib	-0.150078	0.000306741
SNX20	ML162	-0.149013	0.000169023
SNX20	RAF265	-0.14801	0.00293807
SNX20	NVP-ADW742	-0.146791	0.000395099
SNX20	ML006	-0.146029	0.0044964
SNX20	pandacostat	-0.145515	0.00142372
SNX20	BMS-270394	-0.145482	0.00058769
SNX20	necrostatin-7	-0.145361	0.000597811
SNX20	NSC 74859	-0.144962	0.00229239
SNX20	erastin	-0.143715	0.000355838
SNX20	ML203	-0.142429	0.00476985
SNX20	foretinib	-0.142209	0.0003923
SNX20	GDC-0941	-0.14079	0.00078312
SNX20	ML239	-0.140021	0.000507763
SNX20	CIL41	-0.139181	0.0330103
SNX20	Ch-55	-0.138023	0.00145703
SNX20	linsitinib	-0.136612	0.000902245
SNX20	BRD-K02251932	-0.135829	0.00357019
SNX20	ETP-46464	-0.135763	0.0072918
SNX20	ZSTK474	-0.135717	0.00560486
SNX20	YM-155	-0.133658	0.0028796
SNX20	neratinib	-0.133347	0.00109165
SNX20	tivozanib	-0.132037	0.00278641
SNX20	brefeldin A	-0.131919	0.00196439
SNX20	canertinib	-0.131486	0.00210523
SNX20	BIBR-1532	-0.130225	0.00228613
SNX20	SID 26681509	-0.128032	0.00311024
SNX20	AM-580	-0.128022	0.00611719
SNX20	tamoxifen	-0.127354	0.0250847
SNX20	BRD-K48334597	-0.127088	0.238253
SNX20	pyrazolanthrone	-0.126314	0.00472604
SNX20	vorapaxar	-0.125823	0.00410999
SNX20	regorafenib	-0.124319	0.0071647
SNX20	pluripotin	-0.1239	0.00486899
SNX20	SKI-II	-0.123826	0.0033258
SNX20	dabrafenib	-0.121911	0.0822974
SNX20	bleomycin A2	-0.120831	0.013007
SNX20	staurosporine	-0.11973	0.313702
SNX20	HBX-41108	-0.119358	0.0223031
SNX20	GSK4112	-0.118383	0.00873813
SNX20	SCH-529074	-0.117893	0.00807024
SNX20	sorafenib	-0.117309	0.00525479
SNX20	AZD4547	-0.116981	0.00790074
SNX20	BRD9647	-0.115399	0.012513
SNX20	lomeguatrib	-0.114065	0.0265921
SNX20	HC-067047	-0.113766	0.0341034
SNX20	PF-543	-0.112148	0.0113585
SNX20	skepinone-L	-0.111734	0.0708923
SNX20	spautin-1	-0.110452	0.0184929
SNX20	BRD-A02303741	-0.109156	0.0294237
SNX20	CD-1530	-0.107053	0.0351406
SNX20	niclosamide	-0.105612	0.0117282
SNX20	importazole	-0.103512	0.0680308
SNX20	CAY10594	-0.102633	0.0553841
SNX20	968	-0.10229	0.948635
SNX20	cyanoquinoline 11	-0.10196	0.209762
SNX20	trifluoperazine	-0.101902	0.0312478
SNX20	QS-11	-0.100688	0.679155
SNX20	parthenolide	-0.100199	0.0563505
SNX20	MG-132	-0.100112	0.219962
SNX20	fumonisin B1	-0.098932	0.0526359
SNX20	BMS-754807	-0.0981507	0.0227549
SNX20	pifithrin-alpha	-0.0958643	0.073093
SNX20	itraconazole	-0.0953942	0.124592
SNX20	nintedanib	-0.0945239	0.0554976
SNX20	prochlorperazine	-0.0935391	0.0332533
SNX20	BRD-K19103580	-0.0926582	0.0478129
SNX20	salermide	-0.0916745	0.281411
SNX20	lenvatinib	-0.0913885	0.0343667
SNX20	BRD1835	-0.0897765	0.0509808
SNX20	avicin D	-0.0888407	0.290742
SNX20	JW-74	-0.0884873	0.260069
SNX20	ciclosporin	-0.0874727	0.0887182
SNX20	AT-406	-0.0860133	0.368244
SNX20	BRD-K27986637	-0.0852182	0.581111
SNX20	AC55649	-0.0830517	0.441778
SNX20	AZD6482	-0.0828475	0.116961
SNX20	BRD-K33514849	-0.0807667	0.999288
SNX20	istradefylline	-0.0798889	0.585008
SNX20	WZ4002	-0.0796052	0.232876
SNX20	TG-100-115	-0.0785239	0.110562
SNX20	lapatinib	-0.0776603	0.0800325
SNX20	tanespimycin	-0.0771031	0.127143
SNX20	GANT-61	-0.0753627	0.173203
SNX20	BRD9876	-0.0743076	0.210894
SNX20	BRD-K14844214	-0.0740897	0.252106
SNX20	nilotinib	-0.0739687	0.297697
SNX20	BRD4132	-0.0726414	0.230931
SNX20	CAL-101	-0.0725341	0.194722
SNX20	tamatinib	-0.0696471	0.34856
SNX20	quizartinib	-0.0692567	0.223933
SNX20	SJ-172550	-0.0686241	0.497615
SNX20	ibrutinib	-0.0673737	0.249244
SNX20	SR1001	-0.0670288	0.309254
SNX20	BRD-K50799972	-0.0620452	0.36113
SNX20	BMS-536924	-0.0591096	0.264767
SNX20	BRD-K52037352	-0.0560909	0.384461
SNX20	myricetin	-0.0549189	0.602192
SNX20	silmitasertib	-0.0523618	0.532305
SNX20	O-6-benzylguanine	-0.0518817	0.70236
SNX20	BRD-M00053801	-0.0497332	0.638378
SNX20	afatinib	-0.0494399	0.314754
SNX20	BRD-K34099515	-0.0490507	0.954074
SNX20	sildenafil	-0.0484683	0.692075
SNX20	veliparib	-0.0483173	0.53736
SNX20	BMS-195614	-0.0473457	0.455903
SNX20	IU1	-0.0462528	0.619482
SNX20	BRD-K33199242	-0.0422135	0.948158
SNX20	L-685458	-0.0411505	0.515505
SNX20	birinapant	-0.0408041	0.550483
SNX20	Compound 1541A	-0.0401809	0.549357
SNX20	BRD-K27224038	-0.0380665	0.905437
SNX20	SR8278	-0.0380312	0.928699
SNX20	blebbistatin	-0.0372964	0.963346
SNX20	palmostatin B	-0.0358027	0.779723
SNX20	MLN2480	-0.0345922	0.776637
SNX20	IC-87114	-0.0325659	0.663864
SNX20	nelarabine	-0.0308612	0.909413
SNX20	SB-525334	-0.0285639	0.623407
SNX20	BYL-719	-0.0282427	0.724739
SNX20	BRD5468	-0.0275009	0.790614
SNX20	etomoxir	-0.0254931	0.969766
SNX20	ML258	-0.0253416	0.829966
SNX20	SB-431542	-0.0247999	0.841521
SNX20	FSC231	-0.0245244	0.99945
SNX20	cimetidine	-0.024514	0.991749
SNX20	XL765	-0.0240728	0.728109
SNX20	temozolomide	-0.0231228	0.765055
SNX20	BRD-K71781559	-0.0230723	0.993922
SNX20	BRD-K44224150	-0.0228025	0.995413
SNX20	cytochalasin B	-0.0224029	0.709357
SNX20	TGX-221	-0.0176227	0.856505
SNX20	fluvastatin	-0.0173772	0.785767
SNX20	BRD1378	-0.0168206	0.910936
SNX20	BRD-K48477130	-0.0159948	0.945561
SNX20	gefitinib	-0.0155257	0.811349
SNX20	JW-480	-0.0144366	0.943437
SNX20	BRD-K37390332	-0.0143155	0.972738
SNX20	saracatinib	-0.0130424	0.828669
SNX20	BRD-K16147474	-0.0127593	0.98291
SNX20	PRL-3 inhibitor I	-0.0120063	0.945718
SNX20	thalidomide	-0.011185	0.97009
SNX20	pitstop2	-0.00736427	0.976659
SNX20	IPR-456	-0.00657761	0.976854
SNX20	dasatinib	-0.00599112	0.922497
SNX20	PD 153035	-0.00483444	0.952051
SNX20	BRD-K84807411	-0.00343546	0.993538
SNX20	NPC-26	-0.00338201	0.98677
SNX20	VU0155056	-7.4319e-05	0.999899
SNX20	procarbazine	0.000110973	0.999981
SNX20	ML083	0.000796564	0.996777
SNX20	GSK1059615	0.00335882	0.994188
SNX20	cediranib	0.00347705	0.98476
SNX20	KH-CB19	0.00469442	0.97298
SNX20	EX-527	0.00632607	0.967176
SNX20	BRD-K90370028	0.00725	0.989251
SNX20	BEC	0.00830837	0.999979
SNX20	erlotinib	0.00838008	0.885036
SNX20	BRD-K42260513	0.0100443	0.998533
SNX20	erismodegib	0.0103686	0.930303
SNX20	BRD-K04800985	0.0104902	0.999785
SNX20	ifosfamide	0.0116138	0.963914
SNX20	AGK-2	0.0160808	0.971047
SNX20	CID-5951923	0.0181811	0.866265
SNX20	cyclophosphamide	0.0194212	0.997412
SNX20	hyperforin	0.0203249	0.861976
SNX20	lovastatin	0.022238	0.712454
SNX20	CI-976	0.0249909	0.887912
SNX20	WAY-362450	0.0250721	0.998521
SNX20	BRD-A05715709	0.02699	0.876489
SNX20	PLX-4720	0.027444	0.748302
SNX20	BCL-LZH-4	0.0290463	0.908807
SNX20	betulinic acid	0.0293929	0.874248
SNX20	A-804598	0.0301358	0.875717
SNX20	GDC-0879	0.0367268	0.533456
SNX20	selumetinib	0.0378592	0.481592
SNX20	BRD-K49290616	0.0399034	0.936159
SNX20	BRD-K34485477	0.0418552	0.998562
SNX20	semagacestat	0.0420359	0.763778
SNX20	BRD-K30019337	0.0433523	0.902466
SNX20	vandetanib	0.0467316	0.376368
SNX20	BRD-K96970199	0.0471691	0.998764
SNX20	BRD8958	0.0487876	0.982209
SNX20	SZ4TA2	0.049127	0.692185
SNX20	BRD-K64610608	0.0509846	0.650088
SNX20	CIL55	0.0511389	0.833303
SNX20	DNMDP	0.0526588	0.456788
SNX20	MK-0752	0.0537323	0.45571
SNX20	BRD-K41334119	0.0558215	0.933071
SNX20	PD318088	0.0578876	0.230685
SNX20	BRD-K75293299	0.0597814	0.828788
SNX20	SGX-523	0.0609349	0.289507
SNX20	C6-ceramide	0.0615875	0.550458
SNX20	BRD8899	0.061839	0.550968
SNX20	UNC0321	0.0621667	0.537167
SNX20	trametinib	0.0641075	0.421756
SNX20	CBB-1007	0.0643337	0.69395
SNX20	GSK2636771	0.0658486	0.477274
SNX20	sitagliptin	0.0687045	0.997718
SNX20	vemurafenib	0.0701293	0.191463
SNX20	ML312	0.0715663	0.967866
SNX20	NSC30930	0.0741961	0.258951
SNX20	myriocin	0.0753235	0.879765
SNX20	MI-1	0.0785222	0.292389
SNX20	PF-4800567 hydrochloride	0.081825	0.999586
SNX20	CAY10576	0.0836267	0.215784
SNX20	isonicotinohydroxamic acid	0.083733	0.95765
SNX20	austocystin D	0.0889555	0.0522403
SNX20	BRD-K09344309	0.0891144	0.861522
SNX20	simvastatin	0.101749	0.0554471
SNX20	BRD-K78574327	0.102707	0.948504
SNX20	BRD-K09587429	0.103242	0.081774
SNX20	BRD-K96431673	0.113296	0.985799
SNX20	BRD-K86535717	0.116679	0.690114
SNX20	BRD-K17060750	0.127676	0.00579652
SNX20	abiraterone	0.133336	0.287597
SNX20	LY-2157299	0.154204	0.428598
SNX20	ML334 diastereomer	0.159191	0.0125908
SNX20	BRD-K02492147	0.165906	0.00300002
SNX20	VAF-347	0.172677	0.00255229
SNX20	BRD-K99006945	0.188694	0.00624942
SNX20	JW-55	0.195048	0.105604
SNX20	FGIN-1-27	0.217444	0.0510134

## Sheet: Sheet1
symbol	drug	cor	fdr
SNX20	FGIN-1-27	0.217444	0.0510134
SNX20	JW-55	0.195048	0.105604
SNX20	BRD-K99006945	0.188694	0.00624942
SNX20	VAF-347	0.172677	0.00255229
SNX20	BRD-K02492147	0.165906	0.00300002
SNX20	ML334 diastereomer	0.159191	0.0125908
SNX20	LY-2157299	0.154204	0.428598
SNX20	abiraterone	0.133336	0.287597
SNX20	teniposide	-0.419758	4.89156e-17
SNX20	BRD-K30748066	-0.387485	0.015418
SNX20	SR-II-138A	-0.366925	2.05764e-25
SNX20	narciclasine	-0.363822	1.89563e-23
SNX20	GSK461364	-0.36203	1.22091e-23
SNX20	CR-1-31B	-0.357917	1.01048e-23
SNX20	LY-2183240	-0.347964	3.2537e-22
SNX20	LRRK2-IN-1	-0.34362	1.88699e-15
SNX20	SNX-2112	-0.343263	1.03951e-21
SNX20	piperlongumine	-0.342156	1.87048e-21
SNX20	ciclopirox	-0.341216	1.57305e-21
SNX20	PX-12	-0.341006	6.65726e-21
SNX20	triazolothiadiazine	-0.340511	8.6191e-22
SNX20	BI-2536	-0.3383	1.44031e-21
SNX20	cytarabine hydrochloride	-0.338144	4.42436e-21
SNX20	PRIMA-1	-0.335811	2.52719e-19
SNX20	parbendazole	-0.334231	5.87712e-21
SNX20	belinostat	-0.33397	2.12489e-10
SNX20	decitabine	-0.332627	2.03511e-20
SNX20	COL-3	-0.33237	1.67618e-14
SNX20	BRD-K66453893	-0.331662	6.97073e-20
SNX20	panobinostat	-0.329371	4.45121e-20
SNX20	sotrastaurin	-0.327453	9.58368e-14
SNX20	vincristine	-0.326792	1.79192e-20
SNX20	NSC95397	-0.326398	3.74965e-17
SNX20	AT13387	-0.321466	7.15142e-09
SNX20	etoposide	-0.320918	7.32215e-19
SNX20	doxorubicin	-0.317532	5.51913e-19
SNX20	clofarabine	-0.315797	1.26342e-18
SNX20	CHM-1	-0.31564	2.86282e-18
SNX20	tacedinaline	-0.31541	5.59387e-13
SNX20	BRD-A94377914	-0.314998	1.48267e-09
SNX20	PL-DI	-0.31452	9.65307e-18
SNX20	gemcitabine	-0.313627	1.62644e-16
SNX20	ML311	-0.313241	2.79248e-18
SNX20	omacetaxine mepesuccinate	-0.312896	5.22497e-13
SNX20	SB-743921	-0.312262	2.28549e-18
SNX20	necrosulfonamide	-0.312202	2.63698e-12
SNX20	I-BET151	-0.311037	6.32497e-18
SNX20	isoevodiamine	-0.310669	1.199e-17
